# Supplementary material for: Benchmark of four popular virtual screening programs: construction of the active/decoy dataset remains a major determinant of measured performance
Source: PubMed Central journal article supplement (PMC5066283; doi:10.1186/s13321-016-0167-x), 2016-10-17
Supplement: 13321_2016_167_MOESM1_ESM.pdf [file 13321_2016_167_MOESM1_ESM.pdf]

**Table S1.** Bedroc scores ( $\alpha = 80.5$ ) obtained with Gold, Glide, Surflex and FlexX and colored by family (see Table S2).

| Target | Family               | Gold | Glide | Surflex | FlexX |
|--------|----------------------|------|-------|---------|-------|
| aa2ar  | GPCR                 | 0.29 | 0.13  | 0.34    | 0.17  |
| abl1   | Protein kinases      | 0.48 | 0.32  | 0.35    | 0.51  |
| ace    | Miscellaneous        | 0.30 | 0.10  | 0.09    | 0.03  |
| aces   | Miscellaneous        | 0.37 | 0.16  | 0.12    | 0.03  |
| ada    | Miscellaneous        | 0.32 | 0.12  | 0.19    | 0.18  |
| ada17  | Miscellaneous        | 0.35 | 0.46  | 0.56    | 0.05  |
| adrb1  | GPCR                 | 0.43 | 0.31  | 0.25    | 0.18  |
| adrb2  | GPCR                 | 0.43 | 0.50  | 0.41    | 0.36  |
| akt1   | Protein kinases      | 0.42 | 0.24  | 0.05    | 0.11  |
| akt2   | Protein kinases      | 0.62 | 0.41  | 0.24    | 0.27  |
| aldr   | Miscellaneous        | 0.40 | 0.39  | 0.14    | 0.21  |
| ampc   | Miscellaneous        | 0.04 | 0.09  | 0.00    | 0.04  |
| andr   | Nuclear receptors    | 0.04 | 0.37  | 0.08    | 0.01  |
| aofb   | Miscellaneous        | 0.29 | 0.15  | 0.15    | 0.10  |
| bace1  | Cleaving enzymes     | 0.43 | 0.26  | 0.27    | 0.19  |
| braf   | Protein kinases      | 0.43 | 0.56  | 0.15    | 0.51  |
| cah2   | Miscellaneous        | 0.29 | 0.08  | 0.04    | 0.17  |
| casp3  | Miscellaneous        | 0.53 | 0.56  | 0.37    | 0.49  |
| cdk2   | Protein kinases      | 0.30 | 0.47  | 0.07    | 0.24  |
| comt   | Miscellaneous        | 0.68 | 0.71  | 0.05    | 0.17  |
| cp2c9  | CYP450               | 0.12 | 0.04  | 0.05    | 0.19  |
| cp3a4  | CYP450               | 0.21 | 0.17  | 0.13    | 0.08  |
| csf1r  | Protein kinases      | 0.36 | 0.32  | 0.05    | 0.45  |
| cxcr4  | GPCR                 | 0.08 | 0.01  | 0.27    | 0.01  |
| def    | Miscellaneous        | 0.49 | 0.18  | 0.62    | 0.01  |
| dhi1   | Miscellaneous        | 0.17 | 0.15  | 0.13    | 0.02  |
| dpp4   | Miscellaneous        | 0.29 | 0.18  | 0.09    | 0.21  |
| drd3   | GPCR                 | 0.18 | 0.04  | 0.15    | 0.06  |
| dyr    | Miscellaneous        | 0.66 | 0.40  | 0.41    | 0.20  |
| egfr   | Protein kinases      | 0.42 | 0.40  | 0.24    | 0.35  |
| esr1   | Nuclear receptors    | 0.41 | 0.79  | 0.45    | 0.50  |
| esr2   | Nuclear receptors    | 0.32 | 0.75  | 0.43    | 0.51  |
| fa10   | Proteases            | 0.74 | 0.31  | 0.31    | 0.74  |
| fa7    | Proteases            | 0.80 | 0.73  | 0.79    | 0.92  |
| fabp4  | Miscellaneous        | 0.62 | 0.45  | 0.12    | 0.37  |
| fak1   | Protein kinases      | 0.51 | 0.34  | 0.12    | 0.31  |
| fgfr1  | Protein kinases      | 0.80 | 0.26  | 0.30    | 0.31  |
| fkbl1a | Miscellaneous        | 0.23 | 0.62  | 0.22    | 0.01  |
| fnta   | Miscellaneous        | 0.30 | 0.11  | 0.05    | 0.12  |
| fpps   | Miscellaneous        | 0.96 | 0.01  | 0.04    | 0.08  |
| gcr    | Nuclear receptors    | 0.13 | 0.21  | 0.30    | 0.18  |
| glcm   | Miscellaneous        | 0.89 | 0.48  | 0.93    | 0.22  |
| gria2  | Ion channels         | 0.24 | 0.44  | 0.13    | 0.12  |
| grik1  | Ion channels         | 0.42 | 0.31  | 0.19    | 0.36  |
| hdac2  | Histone deacetylases | 0.31 | 0.17  | 0.25    | 0.30  |
| hdac8  | Histone deacetylases | 0.20 | 0.09  | 0.08    | 0.27  |
| hivint | Miscellaneous        | 0.19 | 0.03  | 0.22    | 0.05  |
| hivpr  | Miscellaneous        | 0.30 | 0.14  | 0.10    | 0.05  |
| hivrt  | Miscellaneous        | 0.42 | 0.37  | 0.13    | 0.19  |
| hmdh   | Miscellaneous        | 0.40 | 0.66  | 0.38    | 0.04  |
| hs90a  | Miscellaneous        | 0.23 | 0.03  | 0.02    | 0.03  |
| hvk4   | Miscellaneous        | 0.30 | 0.34  | 0.04    | 0.08  |

**Table S1.** continued

| <b>Target</b> | <b>Family</b>     | <b>Gold</b> | <b>Glide</b> | <b>Surflex</b> | <b>FlexX</b> |
|---------------|-------------------|-------------|--------------|----------------|--------------|
| igf1r         | Protein kinases   | 0.49        | 0.52         | 0.20           | 0.49         |
| inha          | Miscellaneous     | 0.51        | 0.27         | 0.21           | 0.18         |
| ital          | Miscellaneous     | 0.12        | 0.10         | 0.02           | 0.03         |
| jak2          | Protein kinases   | 0.50        | 0.41         | 0.17           | 0.19         |
| kif11         | Miscellaneous     | 0.55        | 0.59         | 0.12           | 0.08         |
| kit           | Protein kinases   | 0.24        | 0.12         | 0.05           | 0.17         |
| kith          | Miscellaneous     | 0.26        | 0.75         | 0.60           | 0.07         |
| kpcb          | Protein kinases   | 0.49        | 0.60         | 0.43           | 0.45         |
| lck           | Protein kinases   | 0.26        | 0.41         | 0.19           | 0.39         |
| lkha4         | Miscellaneous     | 0.29        | 0.54         | 0.47           | 0.16         |
| mapk2         | Protein kinases   | 0.40        | 0.45         | 0.04           | 0.20         |
| mcr           | Nuclear receptors | 0.04        | 0.30         | 0.06           | 0.01         |
| met           | Protein kinases   | 0.64        | 0.44         | 0.17           | 0.35         |
| mk01          | Protein kinases   | 0.46        | 0.26         | 0.03           | 0.39         |
| mk10          | Protein kinases   | 0.39        | 0.28         | 0.03           | 0.29         |
| mk14          | Protein kinases   | 0.24        | 0.34         | 0.06           | 0.29         |
| mmp13         | Miscellaneous     | 0.40        | 0.33         | 0.30           | 0.09         |
| mp2k1         | Protein kinases   | 0.39        | 0.23         | 0.03           | 0.16         |
| nos1          | Miscellaneous     | 0.40        | 0.16         | 0.35           | 0.14         |
| nram          | Miscellaneous     | 0.34        | 0.69         | 0.42           | 0.28         |
| pa2ga         | Miscellaneous     | 0.32        | 0.58         | 0.09           | 0.30         |
| parp1         | Miscellaneous     | 0.24        | 0.65         | 0.34           | 0.28         |
| pde5a         | Miscellaneous     | 0.16        | 0.30         | 0.19           | 0.05         |
| pgh1          | Cyclooxygenases   | 0.22        | 0.24         | 0.14           | 0.09         |
| pgh2          | Cyclooxygenases   | 0.32        | 0.48         | 0.27           | 0.21         |
| plk1          | Protein kinases   | 0.48        | 0.53         | 0.11           | 0.23         |
| pnph          | Miscellaneous     | 0.45        | 0.15         | 0.22           | 0.21         |
| ppara         | Nuclear receptors | 0.32        | 0.19         | 0.37           | 0.09         |
| ppard         | Nuclear receptors | 0.23        | 0.11         | 0.16           | 0.04         |
| pparg         | Nuclear receptors | 0.32        | 0.15         | 0.12           | 0.04         |
| prgr          | Nuclear receptors | 0.07        | 0.05         | 0.07           | 0.10         |
| ptn1          | Miscellaneous     | 0.78        | 0.32         | 0.36           | 0.32         |
| pur2          | Miscellaneous     | 0.97        | 1.00         | 0.98           | 0.99         |
| pygm          | Miscellaneous     | 0.17        | 0.02         | 0.03           | 0.12         |
| pyrd          | Miscellaneous     | 0.50        | 0.57         | 0.27           | 0.48         |
| reni          | Cleaving enzymes  | 0.44        | 0.53         | 0.46           | 0.18         |
| rock1         | Protein kinases   | 0.20        | 0.40         | 0.05           | 0.35         |
| rxra          | Nuclear receptors | 0.53        | 0.79         | 0.54           | 0.27         |
| sahh          | Miscellaneous     | 0.73        | 0.99         | 0.97           | 0.80         |
| src           | Protein kinases   | 0.24        | 0.24         | 0.12           | 0.30         |
| tgfr1         | Protein kinases   | 0.59        | 0.66         | 0.28           | 0.44         |
| thb           | Nuclear receptors | 0.54        | 0.54         | 0.29           | 0.26         |
| thrb          | Proteases         | 0.54        | 0.66         | 0.58           | 0.62         |
| try1          | Proteases         | 0.65        | 0.67         | 0.75           | 0.80         |
| tryb1         | Proteases         | 0.60        | 0.47         | 0.44           | 0.50         |
| ttsy          | Miscellaneous     | 0.76        | 0.65         | 0.46           | 0.32         |
| urok          | Proteases         | 0.66        | 0.85         | 0.29           | 0.77         |
| vgfr2         | Protein kinases   | 0.36        | 0.26         | 0.07           | 0.52         |
| wee1          | Protein kinases   | 0.92        | 0.99         | 0.82           | 0.72         |
| xiap          | Miscellaneous     | 0.49        | 0.80         | 0.45           | 0.57         |

**Table S2.** Definition of the families. The color code is similar to Figures 3 and 4.

| Family name (# of targets) | Target name                                                                                                                                                                                                                            | PDB code                                                                                                                                                                                                                    |
|----------------------------|----------------------------------------------------------------------------------------------------------------------------------------------------------------------------------------------------------------------------------------|-----------------------------------------------------------------------------------------------------------------------------------------------------------------------------------------------------------------------------|
| 1-Protein kinases (26)     | abl1,akt1,akt2,brf,cdk2,csf1r,egfr,fak1,fgfr1,igf1r,jak2,kit,kpcb,lck,mapk2,met,mk01,mk10,mk14,mp2k1,plk1,rock1,src,tgfr1,vgfr2,wee1                                                                                                   | 2hzi,3cqW,3d0e,3d4q,1h00,3krj,2rgp,3bz3,3c4f,2oj9,3lpb,3g0e,2i0e,2of2,3m2w,3lq8,2ojg,2zdt,2qd9,3eqh,2owb,2etr,3el8,3hmm,2p2i,3biz                                                                                           |
| 2-Nuclear receptors (11)   | andr,esr1,esr2,gcr,mcr,ppara,ppard,pparg,prgr,rxra,thb                                                                                                                                                                                 | 2am9,1sj0,2fsz,3bqd,2aa2,2p54,2znp,2gtk,3kba,1mv9,1q4x                                                                                                                                                                      |
| 3-Proteases (6)            | fa7,fa10,thrb,try1,tryb1,urok                                                                                                                                                                                                          | 1w7x,3kl6,1ype,2ayw,2zec,1sqt                                                                                                                                                                                               |
| 4-GPCR (5)                 | aa2ar,adrb1,adrb2,cxcr4,drd3                                                                                                                                                                                                           | 3eml,2vt4,3ny8,3odu,3pbl                                                                                                                                                                                                    |
| 5-Cleaving enzymes (2)     | bace1,reni                                                                                                                                                                                                                             | 3l5d,3g6z                                                                                                                                                                                                                   |
| 6-Cyclooxygenases (2)      | pgh1,pgh2                                                                                                                                                                                                                              | 2oyu,3ln1                                                                                                                                                                                                                   |
| 7-CYP450 (2)               | cp2c9,cp3a4                                                                                                                                                                                                                            | 1r9o,3nxu                                                                                                                                                                                                                   |
| 8-Ion channels (2)         | gria2,grik1                                                                                                                                                                                                                            | 3kgc,1vso                                                                                                                                                                                                                   |
| 9-Histone deacetylases (2) | hdac2,hdac8                                                                                                                                                                                                                            | 3max,3f07                                                                                                                                                                                                                   |
| 10-Miscellaneous (44)      | aces,ace,ada17,ada,aldr,ampc,aofb,cah2,casp3,comt,def,dhi1,dpp4,dyr,fabp4,fbk1a,fnta,fpps,glcm,hivint,hivpr,hivrt,hmdh,hs90a,hxk4,inha,ital,kif11,kith,lkha4,mmp13,nos1,nram,pa2ga,parp1,pde5a,pnph,ptn1,pur2,pygm,pyrd,sahh,tysy,xiap | 1e66,3bkl,2oi0,2e1w,2hv5,1l2s,1s3b,1bcd,2cnk,3bwm,1lru,3frj,2i78,3nxo,2nnq,1j4h,3e37,1zw5,2v3f,3nf7,1xl2,3lan,3ccw,1uyg,3f9m,2h7l,2ica,3cjo,2b8t,3chp,830c,1qw6,1b9v,1kvo,3l3m,1udt,3bgs,2azr,1njs,1c8k,1d3g,1li4,1syn,3hl5 |

**Table S3.** Summary of the most important properties for some particular targets. For the protease family the values were averaged over all the targets of this family. The quality of the BEDROC scores are shown under the target name, in the same order as in Table S1, i.e., **Gold, Glide, Surflex and FlexX**. ✓: good score (over 0.6), ✖: moderate score (between 0.4 and 0.6) and –: poor score (under 0.4). The color code is as follows: dark green corresponds to the maximum value and dark orange to the minimum value. Light green in cavity properties: values higher than for the average of the targets. Light green/orange in small molecule properties and similarities: between the second and fifth highest/lowest values.

|                     | Cavity properties |      | Small molecule properties |              |             |             | Similarities               |
|---------------------|-------------------|------|---------------------------|--------------|-------------|-------------|----------------------------|
|                     | (1-FCA)           | Expo | $\Delta$ PSA              | $\Delta$ HBD | $\Delta$ EC | $\Delta$ RB | Sim2D <sub>cryst-act</sub> |
| <Proteases><br>✓✓✖✓ | 0.37              | 0.66 | 0.09                      | -0.20        | -0.03       | 0.10        | 0.06                       |
| Pur2<br>✓✓✓✓        | 0.35              | 0.37 | 0.32                      | 0.22         | -0.04       | 0.20        | 0.27                       |
| Mk01<br>✖---        | 0.35              | 0.37 | -0.11                     | 0.13         | -0.17       | 0.00        | 0.17                       |
| Wee1<br>✓✓✓✓        | 0.31              | 0.43 | -0.02                     | 0.09         | -0.34       | -0.04       | 0.39                       |
| Igflr<br>✖✖-✖       | 0.30              | 0.47 | 0.02                      | 0.11         | -0.09       | -0.01       | 0.06                       |
| Glm<br>✓✖✓-         | 0.28              | 0.42 | 0.08                      | 0.56         | 0.49        | 0.36        | 0.01                       |
| Reni<br>✖✖✖-        | 0.30              | 0.58 | 0.10                      | 0.45         | 0.67        | 0.32        | 0.03                       |
| Xiap<br>✖✓✖✖        | 0.26              | 0.65 | -0.03                     | 0.06         | 0.63        | 0.07        | 0.11                       |
| Sahh<br>✓✓✓✓        | 0.35              | 0.33 | 0.08                      | 0.14         | 0.36        | -0.08       | 0.27                       |

**Table S4.** Average of similarities,  $\text{Sim2D}_{\text{act-act}}$  and  $\text{Sim2D}_{\text{cryst-act}}$ , for each target.

| Target | $\text{Sim2D}_{\text{act-act}}$ | $\text{Sim2D}_{\text{cryst-act}}$ | Target | $\text{Sim2D}_{\text{act-act}}$ | $\text{Sim2D}_{\text{cryst-act}}$ |
|--------|---------------------------------|-----------------------------------|--------|---------------------------------|-----------------------------------|
| aa2ar  | 0.08                            | 0.02                              | hxx4   | 0.13                            | 0.08                              |
| abl1   | 0.07                            | 0.06                              | igf1r  | 0.08                            | 0.06                              |
| ace    | 0.11                            | 0.09                              | inha   | 0.21                            | 0.14                              |
| aces   | 0.07                            | 0.03                              | ital   | 0.12                            | 0.05                              |
| ada    | 0.13                            | 0.10                              | jak2   | 0.07                            | 0.09                              |
| ada17  | 0.10                            | 0.08                              | kif11  | 0.12                            | 0.06                              |
| adrb1  | 0.08                            | 0.09                              | kit    | 0.07                            | 0.06                              |
| adrb2  | 0.08                            | 0.06                              | kith   | 0.23                            | 0.33                              |
| akt1   | 0.09                            | 0.03                              | kpcb   | 0.12                            | 0.08                              |
| akt2   | 0.09                            | 0.06                              | lck    | 0.06                            | 0.04                              |
| aldr   | 0.05                            | 0.09                              | lkha4  | 0.13                            | 0.13                              |
| ampc   | 0.12                            | 0.11                              | mapk2  | 0.08                            | 0.02                              |
| andr   | 0.04                            | 0.05                              | mcr    | 0.07                            | 0.03                              |
| aofb   | 0.06                            | 0.04                              | met    | 0.12                            | 0.15                              |
| bace1  | 0.07                            | 0.04                              | mk01   | 0.19                            | 0.17                              |
| braf   | 0.09                            | 0.03                              | mk10   | 0.09                            | 0.03                              |
| cah2   | 0.07                            | 0.02                              | mk14   | 0.06                            | 0.04                              |
| casp3  | 0.12                            | 0.06                              | mmp13  | 0.09                            | 0.11                              |
| cdk2   | 0.05                            | 0.05                              | mp2k1  | 0.13                            | 0.11                              |
| comt   | 0.25                            | 0.24                              | nos1   | 0.07                            | 0.02                              |
| cp2c9  | 0.05                            | 0.05                              | nram   | 0.19                            | 0.04                              |
| cp3a4  | 0.05                            | 0.03                              | pa2ga  | 0.12                            | 0.05                              |
| csf1r  | 0.08                            | 0.09                              | parp1  | 0.07                            | 0.06                              |
| cxc4   | 0.22                            | 0.07                              | pde5a  | 0.06                            | 0.08                              |
| def    | 0.12                            | 0.10                              | pgh1   | 0.04                            | 0.04                              |
| dhi1   | 0.05                            | 0.06                              | pgh2   | 0.05                            | 0.07                              |
| dpp4   | 0.06                            | 0.04                              | plk1   | 0.12                            | 0.03                              |
| drd3   | 0.07                            | 0.04                              | pnph   | 0.10                            | 0.11                              |
| dyr    | 0.07                            | 0.06                              | ppara  | 0.11                            | 0.08                              |
| egfr   | 0.10                            | 0.11                              | ppard  | 0.12                            | 0.12                              |
| esr1   | 0.06                            | 0.12                              | pparg  | 0.09                            | 0.08                              |
| esr2   | 0.06                            | 0.07                              | prgr   | 0.05                            | 0.05                              |
| fa10   | 0.07                            | 0.06                              | ptn1   | 0.09                            | 0.05                              |
| fa7    | 0.12                            | 0.13                              | pur2   | 0.27                            | 0.27                              |
| fabp4  | 0.16                            | 0.15                              | pygm   | 0.17                            | 0.03                              |
| fak1   | 0.22                            | 0.09                              | pyrd   | 0.11                            | 0.18                              |
| fgfr1  | 0.10                            | 0.03                              | reni   | 0.19                            | 0.03                              |
| fkbl1a | 0.19                            | 0.07                              | rock1  | 0.09                            | 0.04                              |
| fnta   | 0.07                            | 0.06                              | rxra   | 0.10                            | 0.02                              |
| fpss   | 0.15                            | 0.09                              | sahh   | 0.34                            | 0.28                              |
| gcr    | 0.06                            | 0.02                              | src    | 0.07                            | 0.05                              |
| glem   | 0.28                            | 0.01                              | tgfr1  | 0.10                            | 0.08                              |
| gria2  | 0.05                            | 0.05                              | thb    | 0.16                            | 0.11                              |
| grik1  | 0.07                            | 0.04                              | thrb   | 0.07                            | 0.03                              |
| hdac2  | 0.08                            | 0.10                              | try1   | 0.07                            | 0.05                              |
| hdac8  | 0.08                            | 0.06                              | tryb1  | 0.13                            | 0.04                              |
| hivint | 0.09                            | 0.04                              | tysy   | 0.12                            | 0.07                              |
| hivpr  | 0.08                            | 0.05                              | urok   | 0.08                            | 0.07                              |
| hivrt  | 0.04                            | 0.02                              | vgfr2  | 0.06                            | 0.06                              |
| hmdh   | 0.11                            | 0.10                              | weel   | 0.34                            | 0.39                              |
| hs90a  | 0.13                            | 0.03                              | xiap   | 0.22                            | 0.11                              |

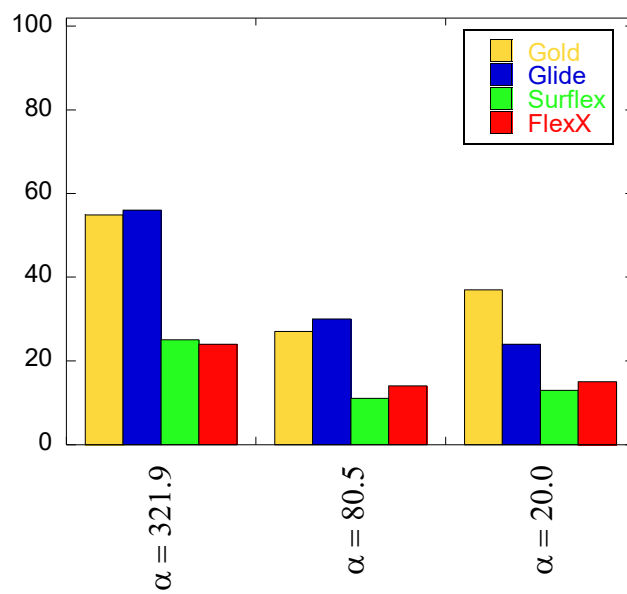

**Figure S1.** Number of targets with BEDROC scores > 0.5, with the three  $\alpha$  parameters, for the four programs.

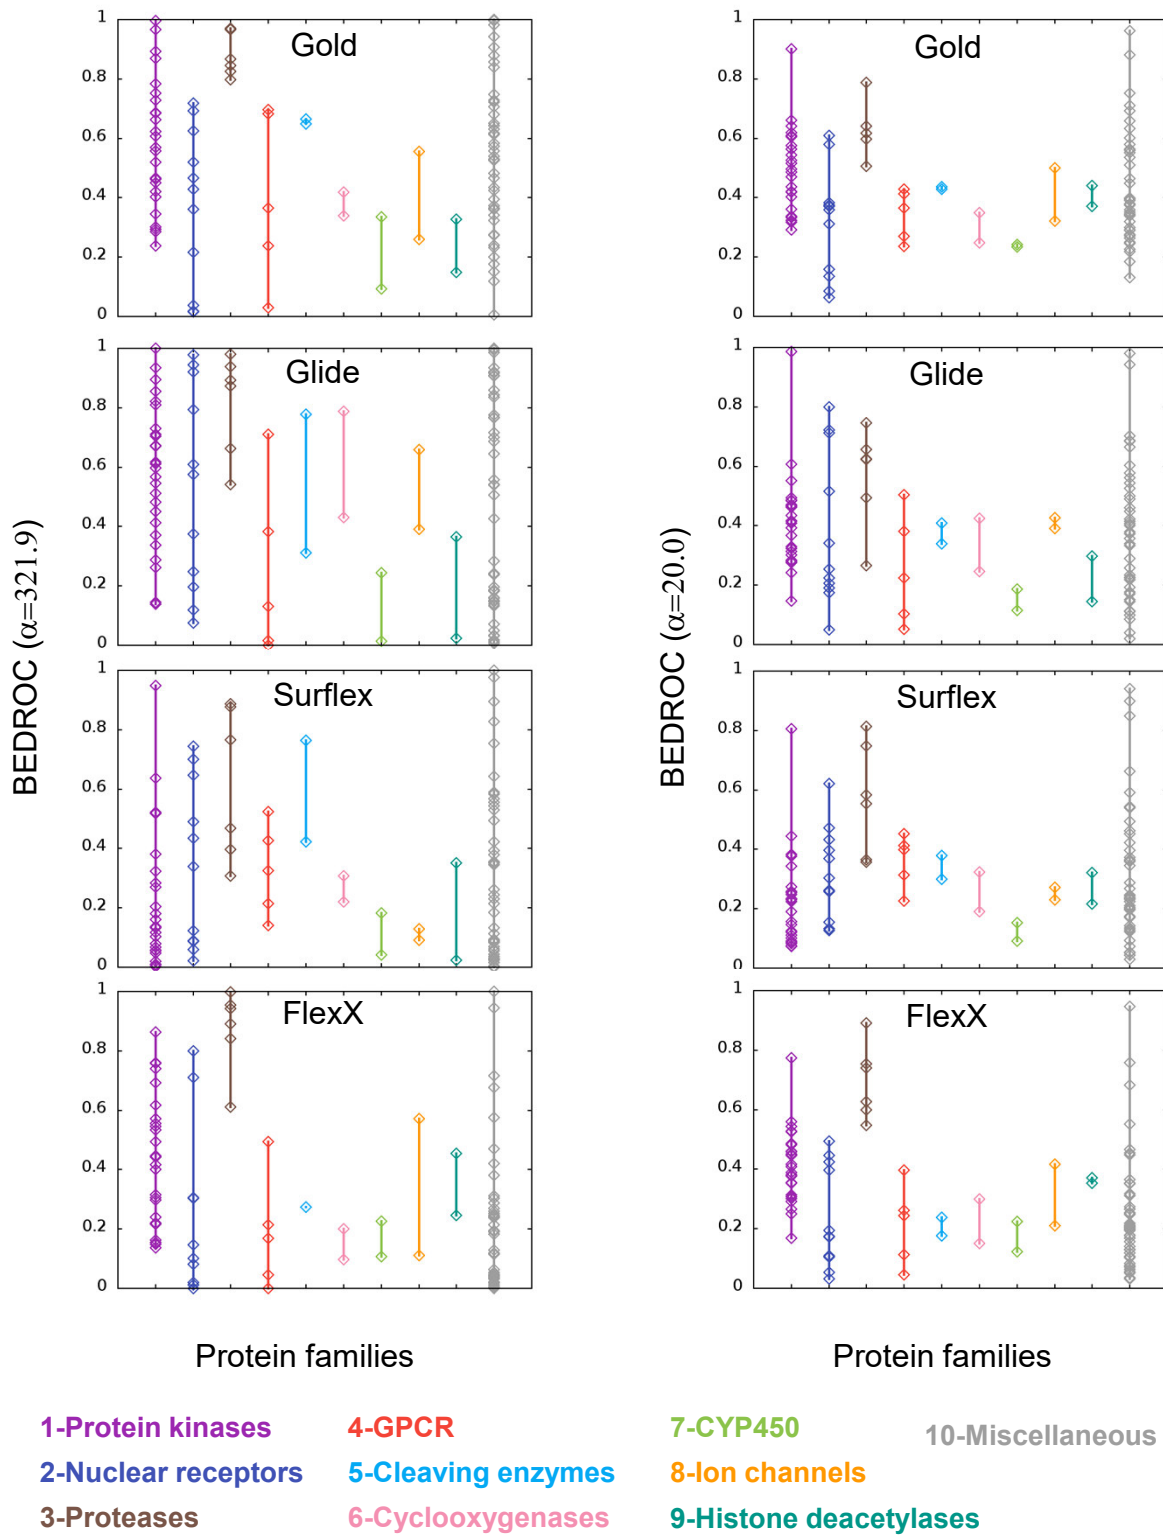

**Figure S2.** Same legend as Figure 3, for BEDROC scores with  $\alpha=321.9$  and  $\alpha=20.0$ .

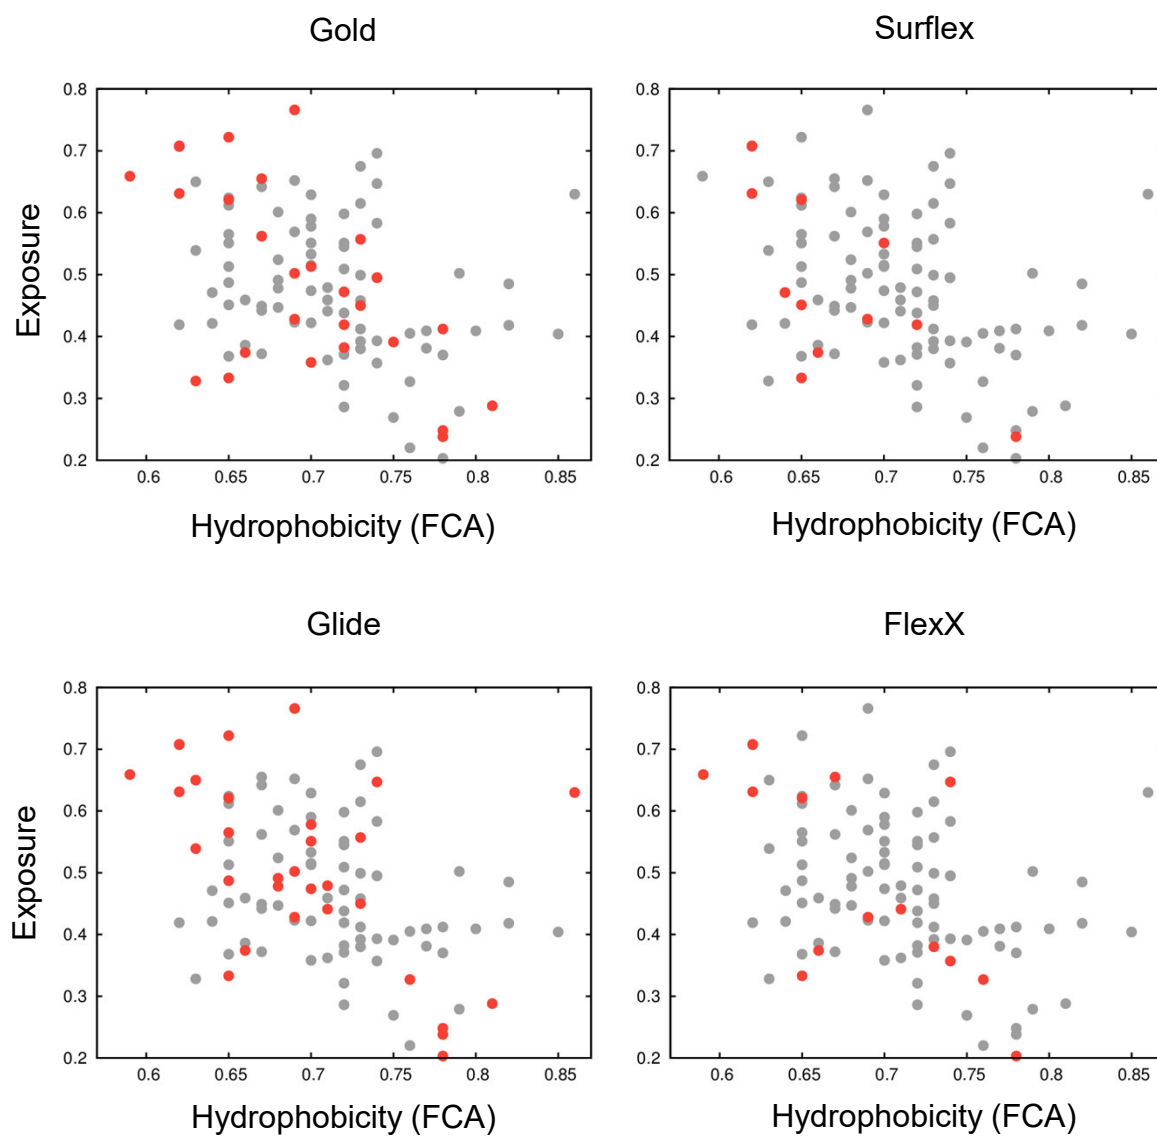

**Figure S3.** Distribution of the high BEDROC scores ( $\alpha=80.5$ ) with respect to the characteristics of the protein cavities. For each target, the exposure of the cavity is represented vs its hydrophobicity. The target that obtained scores  $> 0.5$  are colored in red.



$\alpha=321.9$

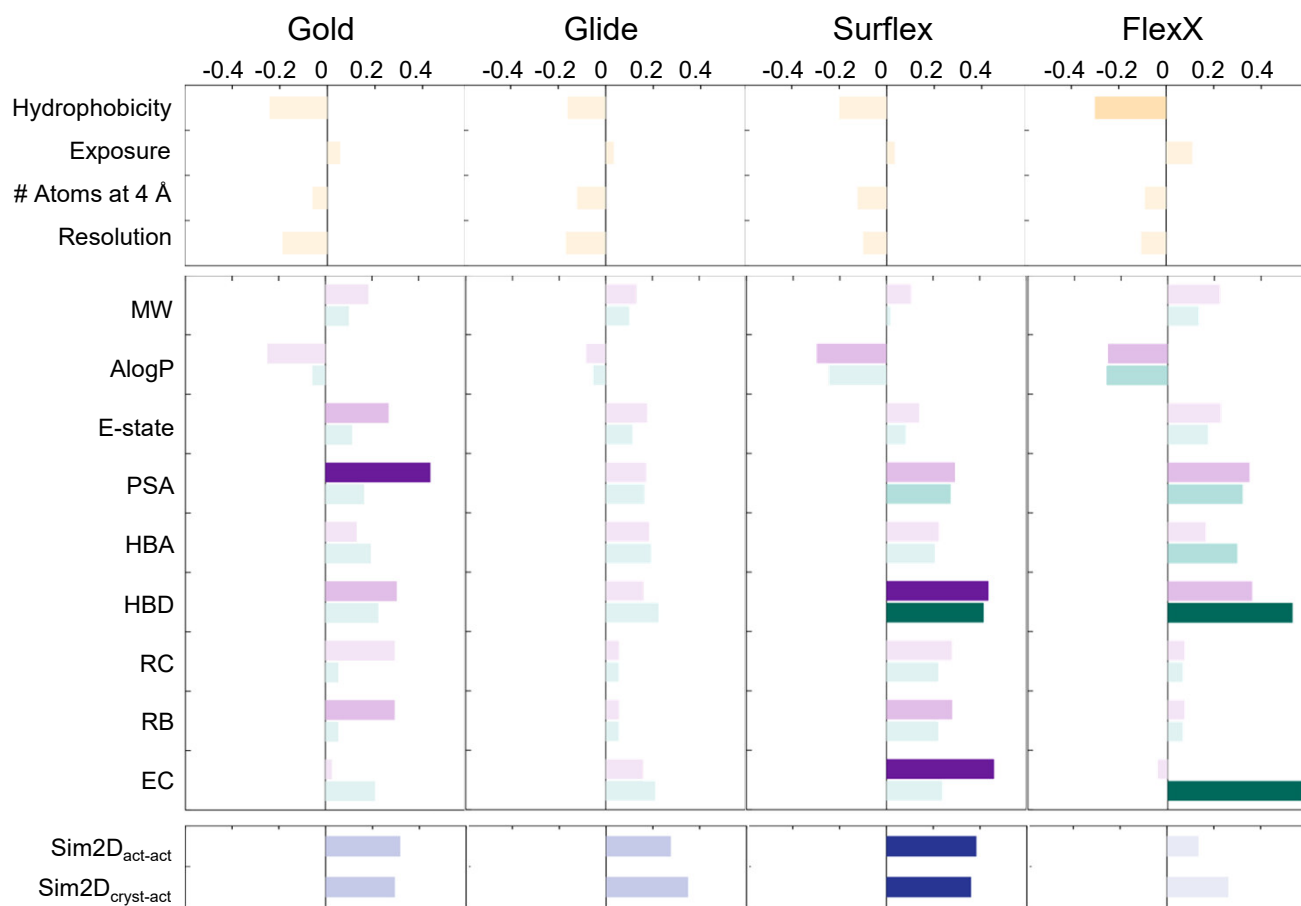

**Figure S4.** continued

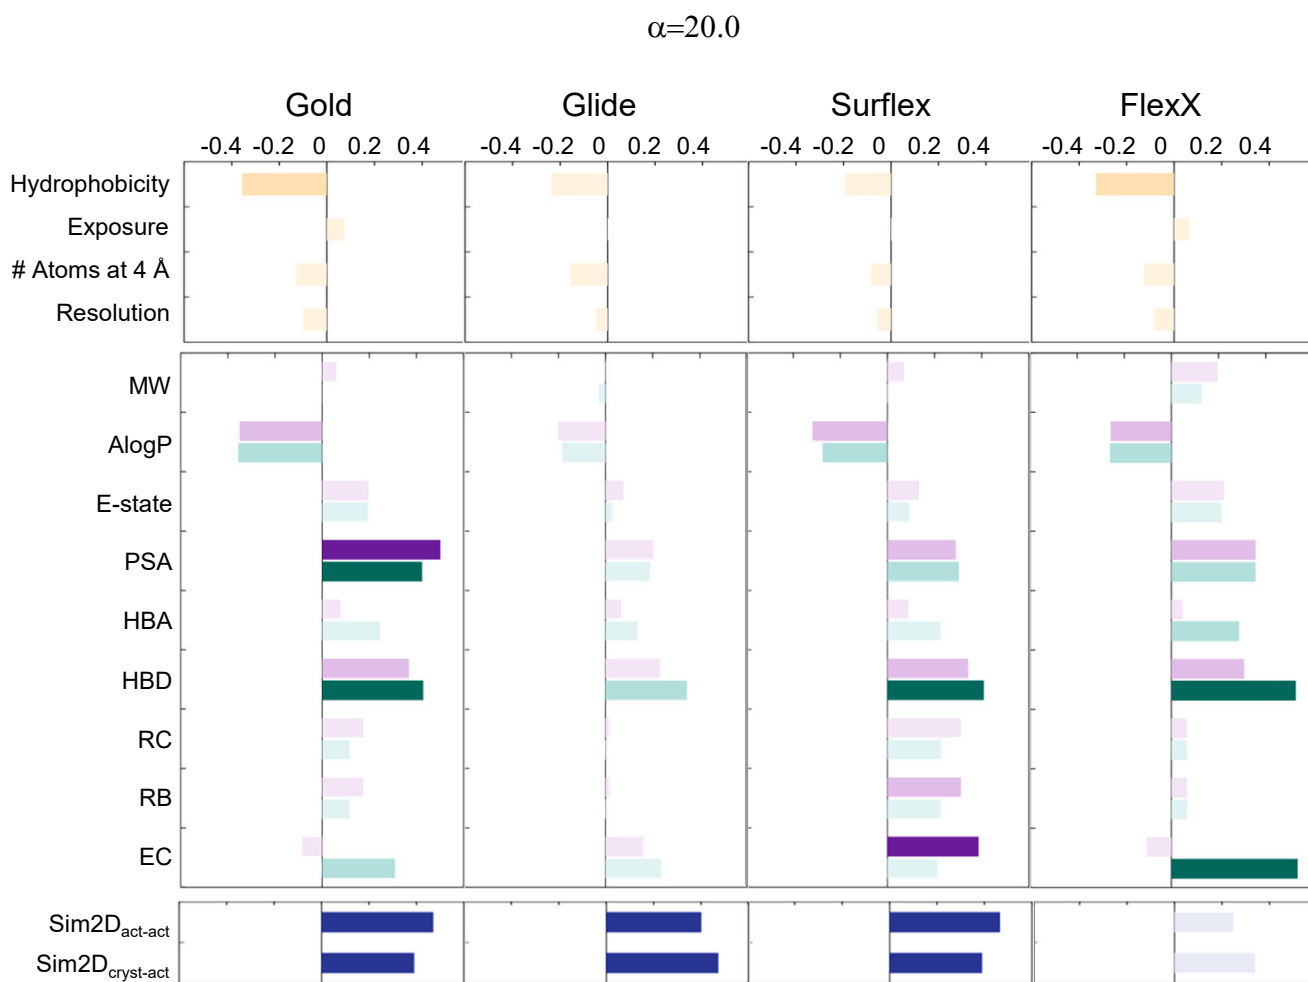

**Figure S4.** Same legend as Figure 5, for BEDROC scores with  $\alpha=321.9$  and  $\alpha=20.0$ .
